# Supplementary material for: New ground ice maps for Canada using a paleogeographic modelling approach
Source: Copernicus journal article supplement (doi:10.5194/tc-13-753-2019), 2019-03-05
Supplement: Supplementary file 1 [file tc-13-753-2019-supplement.zip]

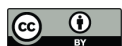

## *Supplement of*

# **New ground ice maps for Canada using a paleogeographic modelling approach**

**H. B. O'Neill et al.**

*Correspondence to:* H. Brendan O'Neill ([hughbrendan.oneill@canada.ca](mailto:hughbrendan.oneill@canada.ca))

- [tc-13-753-2019-supplement-title-page.pdf](#)
- [ONeill\\_et\\_al\\_supplementary.pdf](#)
- [modified\\_surf\\_mat.zip](#)
- [relict\\_ice.zip](#)
- [segregated\\_ice.zip](#)
- [wedge\\_ice.zip](#)

The copyright of individual parts of the supplement might differ from the CC BY 4.0 License.
